## Correction

# Correction: Efficacy comparisons of enteral nutrition and parenteral nutrition in patients with severe acute pancreatitis: A meta-analysis from randomized controlled trials

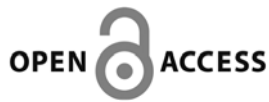

The authors would like to acknowledge a typographical error in the ‘Criteria for inclusion and exclusion’ section of their published article (*Bioscience Reports* (2018) 38(6) <https://doi.org/10.1042/BSR20181515>) to address the statement that studies with a sample size of  $n < 30$  were included. The correct full statement which reflects the inclusion of studies with a sample size of  $n < 20$  is provided below:

“The study inclusion criteria were as follows: (1) design type: randomized controlled trial or cohort study; (2) study population: children or adults with SAP who required enteral or PN for at least 48 h; (3) intervention: enteral or PN. (4) Comparison: EN with PN. Exclusion criteria included (1) experimentation studies, comments, reviews, letters, and conferences abstracts, and (2) studies with very small sample sizes ( $n < 20$ ).”

In addition to this, the authors would like to correct the listed titles of several of the references of their published article to assist readers in finding the citation source:

22. Shi, YG and Yang, MY. (2014) Comparative analysis of enteral nutrition and parenteral nutrition in the treatment of severe acute pancreatitis. *World Health Digest* 14, 165-165 [http://www.wanfangdata.com.cn/details/detail.do?\\_type=perio&id=zwjkwz201414189](http://www.wanfangdata.com.cn/details/detail.do?_type=perio&id=zwjkwz201414189)
23. Tan, ZJ. (2014) Differences between enteral nutrition and total parenteral nutrition in nutrition and prognosis of patients with severe acute pancreatitis. *Chin J Integr Trad West Med Dig.* 22, 619-621 [http://www.wanfangdata.com.cn/details/detail.do?\\_type=perio&id=zgzyjhpwzz201410018](http://www.wanfangdata.com.cn/details/detail.do?_type=perio&id=zgzyjhpwzz201410018)
24. Yin, L. (2012) Clinical observation of enteral nutrition combined with parenteral nutrition in the treatment of severe acute pancreatitis. *China Prac Med.* 7, 97-98 <http://kns.cnki.net/KCMS/detail/detail.aspx?FileName=ZSSA201212060&DbName=CJFQ2012>
25. Zhang, QQ., Jin, ZP and Liu, LZ. (2016) Analysis of early enteral nutrition and parenteral nutrition in the treatment of severe acute pancreatitis. *J Clin Med.* 3, 7566-7566,7567 [http://www.wanfangdata.com.cn/details/detail.do?\\_type=perio&id=lcyydz201638047](http://www.wanfangdata.com.cn/details/detail.do?_type=perio&id=lcyydz201638047)
26. Zhang, XJ., Xing, H., Yin, FY., Zhang, SY and Yang, G. (2015) Comparison of early enteral nutrition and total parenteral nutrition in elderly patients with severe acute pancreatitis. *J Community Med.* 13, 45-46 [http://www.wanfangdata.com.cn/details/detail.do?\\_type=perio&id=sqyxzz201516020](http://www.wanfangdata.com.cn/details/detail.do?_type=perio&id=sqyxzz201516020)

Version of Record published:  
14 February 2020
